## Current Bibliography.

Prepared by the Editor with the assistance of Miss Thursby-Pelham.

**N**OTE. The scope of the Bibliography is limited in the main to the area covered by the Council's activities, but there are included papers of general interest relating to other areas in the North Temperate and Arctic regions and exceptionally elsewhere. Limnological references are not as a rule given, but papers relating to brackish waters and to salmon and freshwater fish studied by the Council are included.

The classification of entries follows in a general way that adopted in Dr. ALLEN's Selected Bibliography published in Vol. I, Nos. 1 and 2 of the Journal, and since reprinted.

Subscribers and those on the distribution list will receive regularly upon application to the Administrative Secretary copies of the Bibliography printed on one side of the page only, for use in making up card indices.

The Editor will be glad to be advised of emendations and additions to the Bibliography.

## Physical and Biological Conditions in the Sea.

### GENERAL HYDROGRAPHY

- BIGELOW, H. B. Dynamic Oceanography of the Gulf of Maine. Bull. Nat. Research Council LXI, 206—11. Washington 1927.
- BIGELOW, H. B. Physical Oceanography of the Gulf of Maine. Bull. Bureau of Fisheries XL, 1924. Part II, 511—1027. 1927.
- BRILLOUIN, M. Conditions mixtes aux frontières. Océans et Continents. Marées statiques. C. R. Acad. Sci. Paris, CLXXXVI, 1665. 1928.
- DEFANT, A. Die systematische Erforschung des Weltmeeres. 459—505. Zeitschr. der Ges. f. Erdkunde. Sonderabdr. aus dem Jubiläums-Sonderband 1928.
- DERJUGIN, K. M. Hydrobiologische Arbeiten bei Nowaja Semlja. Explorat. des Mers d'U.S.S.R. Inst. Hydrolog. Fasc. 4. 1927.
- HUNTSMAN, A. G. The Oceanography of the Canadian Atlantic. Bull. Nat. Research Council LXI, 204—06. Washington 1927.
- ISELIN, C. O. A Study of the Northern Part of the Labrador Current. Bull. Nat. Research Council LXI, 217—22. Washington 1927.
- JESSEN, O. Neue Forschungen über die Strasse von Gibraltar. Forschgn. u. Fortschritte No. 1. 1928.
- JOHNSTONE, J. An Introduction to Oceanography with special Reference to Geography and Geophysics. 2nd Edit. Univ. Press of Liverpool Ltd. 1928.
- JURWA, R. & PALMÉN, E. Die Thalassologische Terminfahrt im Jahre 1926. Merentut. Julk. No. 46. Helsinki 1927.
- MC EWEN, G. F. Recent Progress in the Dynamical Oceanography of the North-eastern Part of the North Pacific Ocean. Bull. Nat. Research Council LXI, 222—35. Washington 1927.
- MILLER, R. C., RAMAGE, W. D. & LAZIER, E. L. A Study of Physical and Chemical Conditions in San Francisco Bay especially in relation to the Tides. Univ. of California Pub. in Zoology XXXI, 201—67. 1928.
- MÖLLER, L. Alfred Merz Hydrographische Untersuchungen in Bosporus und Dardanellen (mit Atlas). Veröff. des Inst. für Meereskunde N. F., A, Heft 18. 1928.
- RAMALHO, A. & DENTINHO, L. Notas sobre as condições oceanográficas ao largo da Costa de Portugal em 1927. Trav. de la Stat. de Biol. Marit. de Lisbonne No. 15. 1928.
- SCHOKALSKY, J. L'Expédition océanographique de la Mer Noire. C. R. Acad. Sci. Paris CLXXXVI, 1707—09. 1928.
- SMITH, E. H. Oceanographic Investigations of the International Ice Patrol. Bull. Nat. Research Council LXI, 212—17. Washington 1927.
- SPEERSCHNEIDER, C. I. H. Isforholdene i de Arktiske Have (The State of the Ice in the Arctic Seas). 1927. Nautisk Meteorologisk Aarbog 1927. Copenhagen 1928.
- THOULET, J. Étude densimétrique dans le Pacifique. Ann. de l'Inst. Océan. IV, 261—84. 1927.
- THOULET, J. Densimétrie et volcanicité abyssale dans le Pacifique. Ann. de l'Inst. Océan. IV, 25—45. 1927.
- THOULET, S. Cuvettes d'effondrements sous-marines. C. R. Acad. Sci. Paris CLXXXVI, 1638—39. 1928.

## Plankton.

- CAMPBELL, A. S. A simplified Plankton Bucket. Science LXVII, 322. 1928.
- CECCHINI, C. Contributo alla conoscenza degli Anfipodi. R. Com. Talass. Italiano. Memoria CXLII. 1928.
- DANGÉARD, P. Phytoplankton de la Croisière du Sylvana (Février-Juin 1913), Mission du Comte J. de Polignac-Gain. Ann. de l'Inst. Océan, IV, 285—405. 1927.
- DANGÉARD, P. Description des Périidiniens Testacés recueillis par la Mission Charcot pendant le mois d'août 1924. Ann. de l'Inst. Océan. III, 307—34. 1926.
- FAGE, L. Sur le "stade natant" (Puerulus) de la Langouste commune (*Palinurus vulgaris* Latr.). Arch. de Zool. Expr. et Générale LXVII. Notes et Revue, 32—38. 1927.
- FAGE, L. & LEGENDRE, R. Pêches planctoniques à la lumière, effectuées à Banyuls-sur-Mer et à Concarneau. I. *Annélides Polychètes*. Arch. de Zool. Expr. et Générale. LXVII, 25—222. 1927.
- FROST, W. E. The Nauplius Larva of *Anelasma squalicola* (Loven). Journ. Mar. Biol. Assoc. XV, 125—28. 1928.
- GRAVIER, CH. & DANTAN, J. L. Sur quelques points de la biologie des *Annélides Polychètes* de la famille des *Néréidiens*. C. R. Acad. Sci. Paris CLXXXVI, 1476—79. 1928.
- GRAVIER, CH. & DANTAN, J. L. SUR quelques résultats obtenus au cours de pêches nocturnes (à la lumière) dans la baie d'Alger. C. R. Acad. Sci. Paris CLXXXVI, 1327—30. 1928.
- HENTSCHEL, E. Deutsche Atlantische Expedition auf dem Vermessungs- und Forschungs-Schiff "Meteor". Vierte Biologische Mitteilung. Int. Rev. der gesamten Hydrob. und Hydrog. XIX, 1—11. 1928.
- ISSEL, R. Rapport sur le plankton. (2e Rapport). Com. Int. pour l'Explor. Sci. de la Mer Méditerranée. Rap. et Proc. Verb. II. N. S. 125—36. 1927.
- KÄNDLER, R. Muschel-Larven aus dem Helgoländer Plankton. Bestimmung ihrer Artzugehörigkeit durch Aufzucht. Wiss. Meeres. N. F. XVI, No. 5, 1—8. Helgoland 1927.
- KLIE, W. Die *Copepoda Harpacticoida* von Helgoland. Wiss. Meeres. N. F. XVI, No. 9, 1—20. Helgoland 1927.
- KRAMP, P. L. The Hydromedusae of the Danish Waters. D. Kgl. Danske Vidensk. Selsk. Skrifter, Naturvidensk. og Mathem. Afd., 8. Række, XII, 1. 1927.
- KUHL, W. Chaetognatha. Die Tierwelt der Nord- und Ostsee (Grimpe u. Wagner). Teil VII, b. 1928.
- LEBOUR, M. V. Studies of the Plymouth Brachyura II. The larval stages of *Ebalia* and *Pinnotheres*. Journ. Mar. Biol. Assoc. XV, 109—24. 1928.
- MACDONALD, R. The Life History of *Thysanoessa raschii*. Journ. Mar. Biol. Assoc. XV, 57—80. 1928.
- MEEK, A. *Bipinnaria astertgera* (Echinoderm), from the Northumberland Plankton. Proc. Zool. Soc. London 1927. 157—71.
- RUUD, J. T. Fluctuations in the larval stages of *Euphausiidae* off Møre 1926—1927. Journ. du Conseil III, 98—101. 1928.
- RUSSELL, F. S. The Vertical Distribution of Marine Macroplankton. VI. Further Observations on Diurnal Changes. Journ. Mar. Biol. Assoc. XV, 81—104. 1928.
- RUSSELL, F. S. The Vertical Distribution of Marine Macroplankton VII. Observations on the Behaviour of *Calanus finmarchicus*. Journ. Mar. Biol. Assoc. XV, 429—54. 1928.
- RUSSELL, F. S. A Net for catching Plankton near the Bottom. Journ. Mar. Biol. Assoc. XV, 105—08. 1928.
- SARS, G. O. An Account of the Crustacea of Norway. Vol. IX. Ostracoda. Parts XV and XVI. *Cytheridae* (concluded). Bergen 1928.
- VIETS, K. Zur Mikrofauna einer Quelle auf der Insel Herdla bei Bergen (Norwegen). Bergens Museums Årbok 1927. Heft 2. 1928.
- WILSON, D. P. The Post-Larval Development of *Loimia medusa*, Sav.. Journ. Mar. Biol. Assoc. XV, 129—50. 1928.
- WILSON, D. P. The Larvae of *Polydora ciliata* Johnston and *Polydora hoplura* Claparède. Journ. Mar. Biol. Assoc. XV, 567—604. 1928.
- WIMPENNY, R. S. A transparent Bucket with a detachable bottom for use with Ostenfeld and Jespersen's Standard Net for Plankton Collection. Journ. du Conseil III, 94—97. 1928.

### Conditions of Production in the Sea.

- MARSHALL, S. M. & ORR, A. P. The Photosynthesis of Diatom Cultures in the Sea. Journ. Mar. Biol. Assoc. XV, 321—60. 1928.
- SCHREIBER, E. Die Reinkultur von marinem Phytoplankton und deren Bedeutung für die Erforschung der Produktionsfähigkeit des Meerwassers. Wiss. Meeres. N. F. XVI. No. 10, 1—34. Helgoland 1927.

### Bottom Fauna.

#### GENERAL

- BLEGVAD, H. Methoden der Untersuchung der Bodenfauna des Meerwassers. Handb. der biol. Arbeitsmethoden (Abderhalden). Abt. IX. Teil 5. Heft 2. 1928.
- DEMEL, K. Essais sur la division Zoogéographique de la Baltique polonaise. Kosmos. Bull. de la Soc. Polonaise des Naturalistes à Leopold XLIX, 831—42. 1924.
- DEMEL, K. Contribution à la connaissance de la faune benthique dans les eaux polonaises de la Baltique. Bull. de l'acad. Polonaise des Sci. et des Lettres. Série B. Sci. Nat. 967—77. 1925.
- DEMEL, K. Liste des invertébrés de la Baltique polonaise. Bydgoszcz 1925.
- FISCHER, E. Sur la faune littorale, du faciès rocheux en particulier, dans un milieu à salure très variable. Bull. de l'Inst. Océan 511. Monaco 1928.
- MOLANDER, A. R. Animal Communities on Soft Bottom Areas in the Gullmar Fjord Kristinebergs Zool. Stat. 1877—1927. No. 2. Stockholm 1928.
- SEGERSTRALE, S. G. Quantitative Studien über den Tierbestand der Fucus-Vegetation in den Schären von Pellinge (an der Süd-Küste Finnlands). Soc. Scient. Fennica. Commentationes Biologicae III. 2. 1928.
- USCHAKOW, P. W. Zur zoogeographischen Charakteristik der litoralen und sublitoralen Zonen der Moller's Bucht. Explorat. des Mers d'U. S. S. R. Inst. Hydrolog. Fasc. 4. 1927.

#### SPECIAL GROUPS

- BERRILL, N. J. Regeneration in the Polychaet *Chaetopterus variopedatus*. Journ. Mar. Biol. Assoc. XV, 151—58. 1928.
- BERRILL, N. J. The Identification and Validity of certain Species of Ascidians. Journ. Mar. Biol. Assoc. XV, 159—76. 1928.
- BERRILL, N. J. The Ascidian Fauna of the Plymouth Area, Journ. Mar. Biol. Assoc. XV, 177—82. 1928.
- CARLREN, O. & STEPHENSON, T. A. The British Edwardsidae. Journ. Mar. Biol. Assoc. XV, 1—32. 1928.
- FAUVEL, P. Tableaux analytiques des Annélides Polychètes des Côtes de France. Bull. de l'Inst. Océan. 510. Monaco 1928.
- FREUND, J. *Anoplura Pinnipedium*. Die Tierwelt der Nord- und Ostsee. (Grimpe u. Wagler). Teil XI d<sub>1</sub>. 1928.
- GALLO, V. R. Dos Equímidos interesantes, *Centrostephanus longispinus* y *Genocidaris maculata*. Notas y Resúmenes Ser. II. No. 23. Madrid 1928.
- GRAVIER, C. & DANTAN, J. L. Sur les stolons sexués acéphales d'une Annélide Polychète (*Syllis (Haplosyllis) spongicola* Grube). Bull. du Muséum Nat. d'Hist. Nat. 378—79. 1927.
- HARANT, H. La Faune Ascidiologique de Banyuls et de Cette. Ann. de l'Inst. Océan. IV, 210—51. 1927.
- HERTLING, H. & ANKEL, W. E. Bemerkungen über Laich und Jugendformen von *Littorina* und *Lacuna*. Wiss. Meeres. N. F. XVI. No. 7, 1—14. Helgoland 1927.
- HORST, C. J. VAN. Pterobranchia. Die Tierwelt der Nord- und Ostsee (Grimpe u. Wagler). Teil VII, a<sub>2</sub>. 1928.
- JAECKEL, S. Ein Beitrag zur Molluskenfauna von Gotland und Finnland. Zoologischer Anzeiger LXXV, 323—28. 1928.
- MASSY, A. L. The Cephalopoda of the Irish Coast. Proc. of the Roy. Irish Acad. XXXVIII, Section B, 25—37. 1928.
- MEISENHEIMER, J. Pantapoda (Nachtrag). Die Tierwelt der Nord- und Ostsee (Grimpe u. Wagler). Teil XI, a<sub>2</sub>. 1928.
- PERKINS, M. A Simple Key to the Crabs (Brachyura) of Britain and the North-East Atlantic. The Scottish Naturalist. 53—59. 1928.

- RAHM, G. Tardigrada. Die Tierwelt der Nörd- und Ostsee (Grimpe u. Wagler. Teil XI, b. 1928.
- REMANE, A. Gastrotricha. Die Tierwelt der Nord- und Ostsee (Grimpe u. Wagler). Lfg. X. Teil VII, d<sub>1</sub>. 1927.
- REMANE, A. Kinetorhyncha. Die Tierwelt der Nord- und Ostsee (Grimpe u. Wagler). Teil VII, d<sub>2</sub>. 1928.
- ROBSON, G. C. Notes on the Cephalopoda. IV. On *Octopus aegina*. V. On the oviposition of *Oelopus rugosus*. Ann. & Mag. of Nat. Hist. 10th Series. Vol. I, 641—47. 1928.
- RUNNSTROM, S. Über die Entwicklung von *Leptosynapta inhaerens* (O. Fr. Müller). Bergens Museums Årbok 1927. Heft 1. 1928.
- SEGERSTRALE, S. G. Kommt bei *Tellina ballica* eine Wanderung aus der Uferzone vor? Soc. Scient. Fennica Commentationes Biologicae II. 11. 1927.
- STEPHEN, A. C. Notes on the Biology of *Tellina tenuis* Da Costa. Journ. Mar. Biol. Assoc. XV, 683—702. 1928.
- STEPHENSON, T. A. The British Sea Anemones. Vol. I. London, Ray Society. 1928.
- TOPSENT, E. Croisière du "Pourquoi-Pas?" en 1926. (Éponges du Scoresby Sund). Ann. de l'Inst., Océan., IV, 253—60. 1927.
- VIETS, K. Halacaridae. Die Tierwelt der Nord- und Ostsee (Grimpe u. Wagler). Lfg. X. Teil XI c. 1927.
- VIETS, K. Die Halacariden des Schärngaards bei Bergen (Norwegen). Bergens Museums Årbok 1927. Heft 2. 1928.

## Fishery Investigations.

### GENERAL

- D'ANCONA, U. Rapport sur la Biologie générale. 1. Distributions géographiques et migrations des organismes animaux et végétaux de la Méditerranée. Com. Int. pour l'Explor. Sci. de la Mer Méditerranée. Rap. et Proc. Verb. II. N. S. 97—124. 1927.
- BOWMAN, A. Line Fishing in the Moray Firth during the Period 1904—1916 (inclusive). Fish. Board for Scot. Sci. Invest. 1927. No. II. Edinburgh 1928.
- BOWMAN, A. Danish Seine-Net Fishing in the Moray Firth. Fish. Board for Scot. Sci. Invest. 1928. No. II. Edinburgh 1928.
- DEMEL, K. La richesse économique de la mer polonaise. Arch. d'Hydrob. et d'Ichthyologie II, 69—118. 1927.
- HENKING, H. Die Errichtung einer Forschungsstation für die Ostseefischerei in Kolberg. Zeitschr. f. Fischerei XXVI, 221—29. Neudamm und Berlin 1928.
- HICKLING, C. F. The Fleetwood Exploratory Voyages for Hake. Journ. du Conseil III, 70—89. 1928.
- PAULSEN, W. Fischerleben an der westlichen Ostseeküste. Der Fischerbote XX, 155—59. 1928.
- VOLTERRA, V. Variazioni e fluttuazioni del numero d'individui in specie animali conviventi. R. Com. Talass. Italiano. Memoria CXXXI. 1927.
- VOLTERRA, V. Variations and Fluctuations of the Number of Individuals in Animal Species living together. Translated by Miss MARY EVELYN WELLS. Journ. du Conseil III, 3—52. 1928.
- WUNDER, W. Sinnesphysiologie-Untersuchungen über die Nahrungsaufnahme bei verschiedenen Knochenfischarten. Int. Rev. der Gesamt. Hydrob. u. Hydrog. XIX, 292—96. 1928.

### EGGS AND LARVAE

- DANTAN, J. L. Recherches sur les premiers stades du développement des Téléostéens. Ann. de l'Inst. Océan. III, 283—304. 1926.
- DE GAETANI, D. Uova e larve di *Physiculus Datwigi*, Kp. R. Com. Talass. Italiano. Memoria CXXXVII. 1928.
- SANZO, L. Uova e larve di *Remora remora* L. R. Com. Talass. Italiano. Memoria CXXXVIII. 1928.

## FISH HATCHERIES

- DANNEVIG, A. Beretning om Flødevigens Udklækningsanstalt. Årsberet. vedr. Norges Fisk., 1927. I, 156—59. 1928.
- DANNEVIG, A. Die Kultur von Meeresfischen in Norwegen. Mitt. des Deutsch. Seefisch-Vereins. XXXIV, 108—26. 1928.
- FISH, C. J. Production and Distribution of Cod Eggs in Massachusetts Bay in 1924 and 1925. Bull. of Bureau of Fisheries U.S.A. XLIII, 253—96. 1927.

## FOOD OF FISH

- HATHAWAY, E. S. The Relation of Temperature to the Quantity of Food consumed by Fishes. Ecology, VIII, 428—34. 1927.

## GROWTH OF FISH — AGE DETERMINATION

- D'ANCONA, U. Il problema dell'accrescimento dei pesci studiato nell' "*Alosa finta*" del Tevere. Mem. T. Accad. Lincei. Roma, (6) 11, Fasc. XVII. 1928.
- STEINBÖCH, O. Die Bestimmung des Alters der Fische. Tiroler Fischer 3. 1928.

## COMMERCIAL FISHERIES

- BULL, B. H. Frysning av agn, kjølelagere. Årsberet. vedr. Norges Fisk. 1927. VIII. 1928.
- ERENBAUM, E. & MARTIN, O. Handelsbezeichnungen von Fischen und Fischereierzeugnissen. Der Fischerbote XX, 43—55. 1928.
- FISHERY BOARD FOR SCOTLAND. Forty-sixth Annual Report. Sea Fisheries Statistical Tables, 1927. H. M. S. O. 1928.
- FISKERIDIREKTØREN (Utgitt av). Fiskeriene i 1926—1927. Offentlige foranstaltninger i fiskeribedriftens interesse. Årsberet. vedk. Norges Fisk. 1927. I, 1—14. 1928.
- LÜBBERT, H. Die Hochseefischerei im Jahre 1927. Der Fischerbote XX, 63—68. 1928.
- LUNDBECK, J. Die Neufahrer Fischerel. Mitt. des Deutsch. Seefischerei-Vereins XXXIV, 3—19, 58—68. 1928.
- MANNFELD, W. Die Seefischerei Lettlands in den Jahren 1924—27. Mitt. des Deutsch. Seefischerei-Vereins XXXIV, 220—25. 1928.
- MOREUX, R. Le bateau de pêche est à la veille de devenir un bateau-usine. La Pêche Maritime 129—31. 1928.
- NOIROT, J. Mémoires divers sur les moyens d'accroître la consommation du Poisson. Ann. de l'Inst. Océan. IV, 1—107. 1927.
- PETERS, N. Holländische Langleinenfischerei und ihre Qualitätsware. Der Fischerbote XX, 227—36. 1928.
- REPORT of the Royal Commission investigating the Fisheries of the Maritime Provinces and the Magdalen Islands. Ottawa. 1928.
- SCHIEMENZ, P. Die Bestockung der Gewässer unseres Binnenlandes mit Fischen aus dem Meere. Fisch. Zeitung. Nos. 7, 8, 9. 1928.
- SCHNAKENBECK, W. Die Nordseefischerei. Bd. V. Teil I. Handb. der Seefisch. Nordeuropas. Stuttgart 1928.
- SCHNEIDER, G. Die Seefischerei von Lettland und Estland. Bd. VIII. Heft 6. Handb. der Seefisch. Nordeuropas. Stuttgart 1928.

## FISHING GEAR

- ANON. Trawl Net Invention (Harrison's Elevator). Fishing News. 14. 4. 28. 23.
- ATKINS, W. R. G. The Preservation of Fishing Nets by Treatment with Copper Soaps and other Substances. Journ. Mar. Biol. Assoc. XV, 219—36. 1928.
- MÖLLER. Ein neues Netzimprägnierungsmittel. Fisch. Zeitung No. 5. 1928.
- TAUTI MORISABURO. Study of Netting Cords II. Relation between the Load and the Elongation of netting cords. Journ. Imp. Fish. Inst. Tokyo XXIII, 85—99. 1927.

## Fishes.

## GENERAL

- ANON. De senaste årens fiskmärkningar vid svenska östersjökusten. Ny Svensk Fiskeritidskrift. 81—85. 1928.

- BRUNELLI, G. Ricerche anatomo-fisiologiche nel significato del pancreas intraepatico nei Teleostei. Rendiconto R. Accad. Lincei. Roma. VII. 83—85. 1928.
- DE BUEN, F. Sobre dos especies del género, *Gobius* (*G. Zebra* Risso y *G. Thori* nov. nom). Notas y Resúmenes Ser. II. No. 22. Madrid 1928.
- BULL, H. O. Studies on Conditioned Responses in Fishes. Part I. Journ. Mar. Biol. Assoc. XV, 485—534. 1928.
- CHABANAUD, P. L'urohyal des Poissons de la famille des *Soléidés*. C. R. Acad. Sci. Paris CLXXXVI, 969—70. 1928.
- CHAIÑE, J. & DUVERGIER, J. Contribution à la détermination des espèces de Poissons du genre *Mugil*. C. R. Acad. Sci. Paris CLXXXVI, 253—55. 1928.
- DANIEL, J. F. The Elasmobranch Fishes. Univ. of California Press. Berkeley 1928.
- DE MEL, K. Liste des Poissons de la Baltique Polonaise. Bydgoszcz 1925.
- DE MEL, K. *Xiphias Gladius* L. in polnischen Territorialgewässern. Bydgoszcz 1925.
- DIÉUZEIDE, R. Sur la transformation et la disparition de certains denticules de la peau du *Centrophore granuleux* (*Centrophorus granulosus* Mull. et Hent.) C. R. Acad. Sci. Paris CLXXXVI, 1314—16. 1928.
- EHRENBAUM, E. Ergänzung des Fischbestandes der Nordsee aus anderen Meeren. Der Fischerbote XX, 83—86. 1928.
- EHRENBAUM, E. Ungewöhnliche Vorkommnisse in der Nordsee. Der Fischerbote XX, 126—30. 1928.
- EHRENBAUM, E. Rare Fishes in the North Sea. Nature CXXI, 709. 1928.
- FRAZER-BRUNNER, A. Some new records of Scorpaenoid Fishes. Naturalist 296—97. 1927.
- HICKLING, C. F. The Luminescence of the Dogfish *Spinax niger* Cloquet. Nature CXXI. 280. 1928.
- LLOYD, J. H. On the Life-History of the Common Nematode of the Dogfish (*Scyllium canicula*). Ann. and Mag. of Nat. Hist. 10th Series. Vol. I. 712—14. 1928.
- MOHR, E. W. & DUNCKER, G. Teleostei Physoclisti. 11—15. Die Tierwelt der Nord- und Ostsee. (Grimpe u. Wagler). Lfg. X. Teil XII, h<sub>2</sub>. 1927.
- PARR, A. E. A Contribution to the Theoretical Analysis of the Schooling Behaviour of Fishes. Occasional Papers of the Bingham Ocean. Collection No. 1. 1928.
- PHILLIPS, W. J. Bibliography of New Zealand Fishes. Fisheries Bull. I. New Zealand Marine Dept. 1927.
- SAEMUNDSSON, B. Synopsis of the Fishes of Iceland. Rit Visindafelags Íslendinga II. 1927.
- SPARTA, A. Contributo alla conoscenza dello sviluppo post-larvale in *Regalecus Glesne* Asc.. R. Com. Talass. Italiano. Memoria CXXXV. 1927.

## PLAICE AND OTHER PLEURONECTIDS

- BJERKAN, P. Merknng av gullfjyndre (rödspotte) i Lofoten. Årsberet. vedr. Norges Fisk. 1927. I. 127—50. 1928.
- DE MEL, K. Sur la répartition des Pleuronectidae dans les eaux polonaises de la Baltique. Bydgoszcz 1925.
- DE MEL, K. Quatre cas de la coloration anormale des Pleuronectes. "Kosmos" Journ. de la Soc. Polonaise des Naturalists. LI, 1—9. 1926.
- HERTLING, H. Ueber Schollenmarkierung und den Wiederfang markierter Schollen aus der Nordsee und dem Barentsmeer. Der Fischerbote XX, 161—69. 1928.
- LÜHRS, J. Die Buttfisherei auf der Unterelbe. Der Fischerbote XX, 104—08. 1928.
- SCHNAKENBECK, W. Otolithen und ihre Beurteilung. Journ. du Conseil III, 90—93. 1928.
- THURSBY-PELHAM, D. E. Report on English Plaice Investigations 1924 and 1925. Fish. Invs. Series II, Vol. X, No. 3. 1927.

## COD

- BOWMAN, A. Review of the Cod Net Fishing in the Moray Firth. Fish. Board for Scot. Sci. Invest. 1928. No. I. Edinburgh 1928.
- DANNEVIG, A. Undersøkelser i forbindelse med torskeutklækningen ved Flødeviken. Naturen, Nov. 1927.
- HAVNO, E. J. Torskemerkningen i Myken 1927. Årsberet. vedr. Norges Fisk. 1927. I. 106—12. 1928.

- POULSSON, E. & WEIDEMANN, G. Torskelevertranens innhold av vitamin A. Årsberet. vedk. Norges Fisk. 1927. IX. 1928.  
 SUND, O. Torskebestanden i 1927. Årsberet. vedr. Norges Fisk. 1927. I. 99—106. 1928.

## HADDOCK

- THOMPSON, H. Haddock Biology IV. The Haddock of the North-Western North Sea. Fish. Board for Scot. Sci. Invest. 1927. No. III. Edinburgh 1928.

## WHITING

- BULL, H. O. The Relationship between the State of Maturity and Chemical Composition of the Whiting, *Gadus merlangus* L. Journ. Mar. Biol. Assoc. XV, 207—18. 1928.

## HAKE

- HICKLING, C. F. The Fleetwood Exploratory Voyages for Hake. Journ. du Conseil III 70—89. 1928.

## HERRING

- ANON. The Importance of the Herring. Fish Trades Gazette XLV, 31—41. 31. 3. 28.  
 ANON. Migrations of the Herring. Fishing News, 14. 4. 28. 34.  
 ANON. The Story of the Common Herring. Fishing News, 9. 6. 28, 31.  
 AWERINZEW, S. Die Heringe des japanischen Meeres. Zool. Anz. LXXXVI, 124—28. 1928.  
 COWAN, D. Herring Investigations 2. Size. Dove Marine Lab. Rep. for the year ending June 30th, 1927, 23—26. 1928.  
 DEMEL, K. De l'Influence de la Vistule sur les pêches du Sprat et du Hareng sur la côte polonaise. (In Polish). Arch. d'Hydrob. et d'Ichthyologie I, 175—82. 1927.  
 FORD, E. Herring Investigations at Plymouth I. Methods of Collection and Treatment of Data. Journ. Mar. Biol. Assoc. XV, 237—66. 1928.  
 FORD, E. Herring Investigations at Plymouth II. The Average Number of Vertebrae for Herrings from the English Channel and South-East of Ireland. Journ. Mar. Biol. Assoc. XV, 267—78. 1928.  
 FORD, E. Herring Investigations at Plymouth III. The Plymouth Winter Fishery during the Seasons 1924—25, 1925—26 and 1926—27. Journ. Mar. Biol. Assoc. XV, 279—304. 1928.  
 FORD, E. Herring Investigations at Plymouth IV. The Growth of Young Herrings in the Neighbourhood of Plymouth. Journ. Mar. Biol. Assoc. XV, 305—20. 1928.  
 GILL, R. Variations in Amino-Acid Distribution in Herring Protein with Maturity. Dove Mar. Lab. Rep. for the Year ending June 30th 1927, 33—43. 1928.  
 HODGSON, W. C. The Decrease in Size of the East Anglian Herring. The Fishing News, 24. 3. 28. 34—35.  
 JESPERSEN, P. Investigations on the Food of the Herring in Danish Waters. Medd. fra Kom. for Havund. Ser. Plankton, Bd. II. No. 2. 1928.  
 LEA, E. Undersökelse over den norske sild fra umoden til moden. Årsberet. vedk. Norges Fisk. 1927. IV. 1928.  
 LEA, E. Undersökelse over silden. Årsberet. vedk. Norges Fisk. 1927, I. 115—27. 1928.  
 LEA, E. Undersökelse vedrørende loven om fredning av sildyngel. Årsberet. vedk. Norges Fisk. 1927, V. 1928.  
 LISSNER, H. Der deutsche Trawlheringsfang 1927. Der Fischerbote XX, 3—10. 1928.  
 LISSNER, H. Monatskarten zur deutschen grossen Heringsfischerei 1927. Ber. der deutsch. Wiss. Komm. f. Meeresf. N. F. IV. Heft 1. 1928.  
 MEEK, A. The Scales of the Herring. Dove Mar. Lab. Rep. for the Year ending June 30th, 1927. 44—48. 1928.  
 STEPHEN, A. C. Migrations of the Herring. The Scottish Naturalist, 51—52. 1928.  
 STORROW, B. Herring Investigations I. Herring Shoals. Dove Mar. Lab. Rep. for the Year ending June 30th, 1927. 9—22. 1928.

## PILCHARD, SPRAT, ANCHOVY

- BJERKAN, P. Brislingundersökelse. Årsberet. vedr. Norges Fisk. 1927, I. 115—27. 1928.  
 DE BUEN, F. Biología y pesca de la sardina, *Sardina pilchardus* (Walbaum). Boletín de Pesca XIII, 101—16. 1928.



## MACKEREL

- PERARD, CH. Sur une maladie du maquereau (*Scomber scomber* L.) due à une Myxosporidie: *Chloromyxum histolyticum* N. sp. C. R. Acad. Sci. Paris CLXXXVI, 108—10. 1928.

## EELS

- ATHANASSOPOULOS, G. Sur les montées restreintes des Civelles dans la partie orientale de la Méditerranée. C. R. Acad. Sci. Paris CLXXXVI, 894—96. 1928.
- BARCLAY, M. Ålen og Ålefsket. Årsberet. vedr. Norges Fisk. 1927. III. 1928.
- FISCHER, E. Neues vom Aal. Mitt. des Deutsch. Seefisch. Vereins. XXXXIV, 225—27. 1928.
- TESCH, J. J. On Sex and Growth Investigations on the Freshwater Eel in Dutch Waters. Journ. du Conseil III, 52—69. 1928.

## FRESHWATER FISH AND POLLUTION

- CLAYTON, F. H. A. Notes on Salmon Furunculosis. Dove Marine Lab. Rep. for the Year ending June 30th, 1927. 49—55. 1928.
- GILL, R. Pollution of the River Tyne, 1926—27. Dove Marine Lab. Rep. for the Year ending June 30th, 1927. 27—32. 1928.
- STORROW, B. The Salmon as a Sea Fish. Salmon & Trout Mag. April 1928.
- WILLIAMSON, I. J. F. Furunculosis of the Salmonidae. Fisheries, Scotland, Salmon Fish., V, 1928.

## CRUSTACEA

- DANNEVIG, A. Hummeropdretningen. Årsberet. vedr. Norges Fisk., 1927. I. 159—165. 1928.
- DANNEVIG, A. The Rearing of Lobster Larvae at Flødevigen. Rep. Norwegian Fish. and Marine Invest. III, No. 9. 1928.
- LE GALL, J. La taille marchande des Homards et le dépeuplement des Fonds. La Pêche Maritime, 225—27. 1928.
- POULSEN, E. M. Über den Hummer and die Hummerfischerei in den dänischen Gewässern. Mitt. des deutsch. Seefischerei Vereins. XXXXIV, 171—79. 1928.
- SCHUBART, O. Garneleinfischerei zu Pferde. Mitt. des deutsch. Seefischerei Vereins. XXXXIV, 179—85. 1928.

## WHALES, WHALING AND SEALING

- BACKER, S. Walfang im Rossmeer. Der Fischerbote XX, 201—25. 1928.
- BACKER, S. Ist das Aussterben der Wale zu befürchten? Der Fischerbote XX, 114—16. 1928.
- DAMANT, G. C. C. The Buoyancy of Whales. Nature CXXI, 829—30. 1928.
- GRAY, R. W. The Buoyancy of Whales. Nature CXXI, 421—22, 710, and 988. 1928.
- GRAY, R. W. The Blubber of Whales. Nature CXXI, 791—92. 1928.
- GRAY, R. W. The Pulmonary Circulation of the Whale. Nature CXXI, 905. 1928.
- HARMER, S. F. The Buoyancy of Whales. Nature CXXI, 748. 1928.
- IVERSEN, T. Drivis og Selfangst. Årsberet. vedr. Norges Fisk. 1927. II. 1928.
- KEMP, S. The Discovery Expedition. Nature CXXI, 795—99. 1928.
- KÜLPER, W. & NUMSSEN, J. Noch einmal die Seehundsfrage. Der Fischerbote XX, 32—35. 1928.
- MORLEY, F. V. & HODGSON, J. S. Whaling North and South. Methuen & Co. London 1927.
- SCHNAKENBECK, W. Der Walfang. Bd. V. Heft 4. Handb. der Seefisch. Nordeuropas. Stuttgart 1928.

## Oysters and other Lamellibranchs.

- AMEMIYA, I. Ecological Studies of Japanese Oysters, with special reference to the Salinity of their Habitats. Journ. Coll. Agric. Imp. Univ. Tokyo IX, 5, 334—82. 1928.
- AMIRTHALINGAM, C. On Lunar Periodicity in Reproduction on *Pecten opercularis* near Plymouth in 1927—28. Journ. Mar. Biol. Assoc. XV, 605—42. 1928.
- ANON. Nouvelles observations sur les huîtres (*Ostrea edulis*) du Limfjord. La Pêche Maritime, 196—97. 1928.

- HAGMEIER, A. & KÄNDLER, R. Neue Untersuchungen im nordiriesischen Wattenmeer und auf den fiskalischen Austernbänken. Wiss. Meeres. N. F. XVI, No. 6, 1—90. Helgoland 1927.
- HORI, JUZO & KUSAKABE, DAJIRO. On the Artificial Culture of Oyster larvae (II). Journ. Imp. Fish. Inst. Tokyo XXIII, 79. 1927.
- JONES, D. B., NELSON, E. M. & MURPHY, J. C. Biological Values of Certain Types of Sea Foods III. Vitamins in Clams. Industrial & Engineering Chemistry (Easton, Pa. U.S.A.) XX, 648—52. 1928.
- KÄNDLER, R. Aufzucht holländischer Saataustern auf den preussisch-fiskalischen Austernbänken. Der Fischerbote XX, 130—35. 1928.
- NELSON, T. C. On the Distribution of Critical Temperature for Spawning and Giliary Activity in Bivalve Molluscs. Science LXVII, 220—21. 1928.
- ORTON, J. H. On Rhythmic Periods in Shell-growth in *O. edulis* with a note on Fattening. Journ. Mar. Biol. Assoc. XV, 365—428. 1928.
- RANSOM, G. L'Absorption de matières organiques dissoutes par la surface extérieure du corps chez les animaux aquatiques. Ann. de l'Inst. Océan. III, 49—175. 1927.
- UYEDA SABURO. Neue grüne Alge als Nahrung für die Schalenlarven der Auster. Journ. Imp. Fish. Inst. Tokyo XXIII, 78. 1927.
- YONGE, C. M. The Absorption of Glucose by *Ostrea edulis*. Journ. Mar. Biol. Assoc. XV, 643—54. 1928.

#### Biological—Miscellaneous.

- BRUCE, J. R. Physical Factors on the Sandy Beach. Part I. Tidal, Climatic and Edaphic. Journ. Mar. Biol. Assoc. XV, 535—52. 1928.
- BRUCE, J. R. Physical Factors on the Sandy Beach. Part II. Chemical changes — Carbon Dioxide Concentration and Sulphides. Journ. Mar. Biol. Assoc. XV, 553—67. 1928.
- CLARK, A. Animals of Land and Sea. pp. 276. Chapman & Hall. London 1928.
- DANGÉARD, P. Sur le dégagement d'iode libre chez les algues marines. C. R. Acad. Sci. Paris CLXXXVI, 892—94. 1928.
- HERTER, K. Taxien und Tropismen der Tiere. Tabulae Biologicae IV, 348—76. Berlin 1927.
- HILL, C. L. & KOFOID, C. A. Marine Borers and their Relation to Marine Construction on Pacific Coast. Univ. of California Press. Berkeley 1928.
- LABBÉ, A. L'Origine des Marais Salants du Croisic. Ann. de l'Inst. Océan. III, 335—68. 1927.
- PETERSEN, C. G. JOH. On some Biological Principles. Det Kgl. Danske Vidensk. Selskab. Biol. Medd. VII. 21—54. 1928.
- POHL, L. Avantages et inconvénients que peut présenter la culture sous-marine des Perles fines dans les Colonies françaises. Bull. Trim. de l'Enseignement des Pêches Maritimes. XXXII, No. 2, 38—53. 1927.
- RUNNSTRÖM, S. Über die Thermopathie der Fortpflanzung und Entwicklung mariner Tiere in Beziehung zu ihrer geographischen Verbreitung. Bergens Museums Årbok 1927, Heft 1. 1928.
- SCHLIEFER, C. Die biologische Bedeutung der Salzkonzentration der Gewässer. Naturwissenschaften 16, 1928.
- SCHILLER, J. Über Kultur und Methodik beim Studium der Meerospflanzen. Handb. der Biol. Arbeitsmethoden (Abderhalden). Abt. IX, Teil 5, Heft 2. 1928.
- SEXTON, E. W. On the Rearing and Breeding of Gammarus in Laboratory Conditions. Journ. Mar. Biol. Assoc. XV, 33—56. 1928.
- VISSCHER, J. P. Nature and Extent of Fouling of Ships' Bottoms. Bull. Bur. of Fisheries U.S.A. XLIII, 1927, 193—252. 1928.
- YONGE, C. M. Feeding Mechanisms in the Invertebrates. Biol. Reviews & Biol. Proceedings of the Cambridge Phil. Soc. III, 21—76. 1928.
